# Supplementary material
Source: publisher figshare collection journal article supplement (https://sage.figshare.com/ndownloader/files/15034793)
Supplement: Supplementary file 1 [file 15034793]

**Supplemental Table: The 100 most mentioned neuroimaging articles ranked in order of the Altmetric Attention Score**

| Ranking | Article                                                                                                                                                                                                                               | Altmetric Attention Score | Number of Citations (1980-2018) |
|---------|---------------------------------------------------------------------------------------------------------------------------------------------------------------------------------------------------------------------------------------|---------------------------|---------------------------------|
| 1       | Soares de Oliveira-Szejnfeld P, et al. Congenital brain abnormalities and Zika virus: what the radiologist can expect to see prenatally and postnatally. <i>Radiology</i> 2016;281(1):203-218                                         | 1467                      | 80                              |
| 2       | De Fatima Vasco Aragao M, et al. Clinical features and neuroimaging (CT and MRI) findings in presumed Zika virus related congenital infection and microcephaly: retrospective case series study. <i>BMJ</i> 2016;13;353:i1901         | 1249                      | 68                              |
| 3       | Hougaard A, et al. Evidence of a Christmas spirit network in the brain: functional MRI study. <i>BMJ</i> 2015;351:h6266                                                                                                               | 1127                      | 1                               |
| 4       | Cook PF, et al. Awake canine fMRI predicts dogs' preference for praise versus food. <i>Soc Cogn Affect Neurosci</i> 2016;11(12):1853-1862                                                                                             | 1124                      | 5                               |
| 5       | Roberts DR, et al. Effects of spaceflight on astronaut brain structure as indicated on MRI. <i>N Engl J Med</i> 2017;377(18):1746-1753                                                                                                | 937                       | 4                               |
| 6       | Tan A, et al. The human hippocampus is not sexually-dimorphic: meta-analysis of structural MRI volumes. <i>Neuroimage</i> 2016;124:350-366                                                                                            | 874                       | 23                              |
| 7       | Raichlen DA, et al. Differences in resting state functional connectivity between young adult endurance athletes and healthy controls. <i>Front Hum Neurosci</i> 2016;10:610                                                           | 816                       | 6                               |
| 8       | Amen DG, et al. Discriminative properties of hippocampal hypoperfusion in marijuana users compared to healthy controls: implications for marijuana administration in Alzheimer's dementia. <i>J Alzheimers Dis</i> 2017;56(1):261-273 | 805                       | 0                               |
| 9       | Rodriguez P, et al. Multimodal randomized functional MR imaging of the effects of methylene blue in the human brain. <i>Radiology</i> 2016;281(2):516-526                                                                             | 716                       | 7                               |

|                 |                                                                                                                                                                                                                               |     |     |
|-----------------|-------------------------------------------------------------------------------------------------------------------------------------------------------------------------------------------------------------------------------|-----|-----|
| 10              | Hayes SM, et al. FMRI activity during associative encoding is correlated with cardiorespiratory fitness and source memory performance in older adults. <i>Cortex</i> 2017;91:208-220                                          | 692 | 3   |
| 11              | Amen DG, et al. Gender-based cerebral perfusion differences in 46,034 functional neuroimaging scans. <i>J Alzheimers Dis</i> 2017;60(2):605-614                                                                               | 667 | 0   |
| 12              | Arnold DL, et al. Superior MRI outcomes with alemtuzumab compared with subcutaneous interferon $\beta$ -1a in MS. <i>Neurology</i> 2016;87(14):1464-1472                                                                      | 615 | 6   |
| 13              | Lodygensky GA, et al. Toward quantitative MRI analysis: a smart approach to characterize neonatal white matter injury. <i>Neurology</i> 2017;88(7):610-611                                                                    | 607 | 0   |
| 14              | Creswell JD, et al. Alterations in resting state functional connectivity link mindfulness meditation with reduced interleukin-6: a randomized controlled trial. <i>Biol Psychiatry</i> 2016;80(1):53-61                       | 605 | 27  |
| 15              | Liu TT, et al. Magnetic resonance perfusion image features uncover an angiogenic subgroup of glioblastoma patients with poor survival and better response to antiangiogenic treatment. <i>Neuro Oncol</i> 2017;19(7):997-1007 | 596 | 4   |
| 16              | Royet JP, et al. The neural bases of disgust for cheese: an fMRI study. <i>Front Hum Neurosci</i> 2016;10:511                                                                                                                 | 575 | 2   |
| 17              | Bos D, et al. Prevalence, clinical management, and natural course of incidental findings on brain MR images: the population-based Rotterdam scan study. <i>Radiology</i> 2016;281(2):507-515                                  | 547 | 11  |
| 18 <sup>a</sup> | Wager TD, et al. An fMRI-based neurologic signature of physical pain. <i>N Engl J Med</i> 2013;368(15):1388-1397                                                                                                              | 533 | 351 |
| 18 <sup>a</sup> | Hepp DH, et al. Loss of functional connectivity in patients with Parkinson disease and visual hallucinations. <i>Radiology</i> 2017;285(3):896-903                                                                            | 533 | 1   |
| 20              | Godwin CA, et al. Functional connectivity within and between intrinsic networks correlates with trait mind wandering. <i>Neuropsychologia</i> 2017;103:140-153                                                                | 523 | 0   |
| 21              | Xu KZ, et al. Neural basis of cognitive control over movement inhibition: human fMRI and                                                                                                                                      | 513 | 1   |

|    |                                                                                                                                                                                                                               |     |     |
|----|-------------------------------------------------------------------------------------------------------------------------------------------------------------------------------------------------------------------------------|-----|-----|
|    | primate electrophysiology evidence. <i>Neuron</i> 2017;96(6):1447-1458.e6                                                                                                                                                     |     |     |
| 22 | Harper DE, et al. Resting functional connectivity of the periaqueductal gray is associated with normal inhibition and pathological facilitation in conditioned pain modulation. <i>J Pain</i> 2018;19(6):635.e1-635.e15       | 491 | 0   |
| 23 | Pottala JV, et al. Higher RBC EPA + DHA corresponds with larger total brain and hippocampal volumes WHIMS-MRI Study. <i>Neurology</i> 2014;82(5):435-442                                                                      | 488 | 49  |
| 24 | Zeinab Barati, et al. Functional near-infrared spectroscopy study on tonic pain activation by cold pressor test. <i>Neurophotronics</i> 2017;4(1):015004                                                                      | 486 | 1   |
| 25 | Ruigrok AN, et al. A meta-analysis of sex differences in human brain structure. <i>Neurosci Biobehav Rev</i> 2014;39:34-50                                                                                                    | 479 | 182 |
| 26 | Tang S, et al. Central nervous system changes induced by underbody blast-induced hyperacceleration: an in vivo diffusion tensor imaging and magnetic resonance spectroscopy study. <i>J Neurotrauma</i> 2017;34(11):1972-1980 | 463 | 1   |
| 27 | Fischer DB, et al. A human brain network derived from coma-causing brainstem lesions. <i>Neurology</i> 2016;87(23):2427-2434                                                                                                  | 455 | 17  |
| 28 | Levitin DJ, et al. Measuring the representational space of music with fMRI: a case study with Sting. <i>Neurocase</i> 2016;22(6):548-557                                                                                      | 453 | 1   |
| 29 | He BJ, et al. The fMRI signal, slow cortical potential and consciousness. <i>Trends Cogn Sci</i> 2009;13(7):302-309                                                                                                           | 434 | 166 |
| 30 | Maguire EA, et al. London taxi drivers and bus drivers: a structural MRI and neuropsychological analysis. <i>Hippocampus</i> 2006;16(12):1091-1101                                                                            | 406 | 285 |
| 31 | Li S, et al. Reduced integrity of right lateralized white matter in patients with primary insomnia: a diffusion-tensor imaging study. <i>Radiology</i> 2016;280(2):520-528                                                    | 374 | 10  |
| 32 | Stender J, et al. Diagnostic precision of PET imaging and functional MRI in disorders of                                                                                                                                      | 367 | 88  |

|                 |                                                                                                                                                                                                                           |     |     |
|-----------------|---------------------------------------------------------------------------------------------------------------------------------------------------------------------------------------------------------------------------|-----|-----|
|                 | consciousness: a clinical validation study. <i>Lancet</i> 2014;384(9942):514-522                                                                                                                                          |     |     |
| 33              | Desai J, et al. Reduced perfusion in Broca's area in developmental stuttering. <i>Hum Brain Mapp</i> 2017;38(4):1865-1874                                                                                                 | 365 | 4   |
| 34              | Fischer K, et al. Biomarker profiling by nuclear magnetic resonance spectroscopy for the prediction of all-cause mortality: an observational study of 17,345 persons. <i>PLoS Med</i> 2014;11(2):e1001606                 | 362 | 86  |
| 35              | De Giglio L, et al. Multiple sclerosis: changes in thalamic resting-state functional connectivity induced by a home-based cognitive rehabilitation program. <i>Radiology</i> 2016;280(1):202-311                          | 343 | 11  |
| 36              | Sprooten E, et al. Addressing reverse inference in psychiatric neuroimaging: meta-analyses of task-related brain activation in common mental disorders. <i>Hum Brain Mapp</i> 2017;38(4):1846-1864                        | 334 | 11  |
| 37              | Smith AM, et al. Voluntary out-of-body experience: an fMRI study. <i>Front Hum Neurosci</i> 2014;8:70                                                                                                                     | 325 | 6   |
| 38              | Goldstein RZ, et al. Dysfunction of the prefrontal cortex in addiction: neuroimaging findings and clinical implications. <i>Nat Rev Neurosci</i> 2011;12(11):652-669                                                      | 324 | 722 |
| 39              | Spann MN, et al. Maternal immune activation during the third trimester is associated with neonatal functional connectivity of the salience network and fetal to toddler behavior. <i>J Neurosci</i> 2018;38(11):2877-2886 | 307 | 1   |
| 40              | Filbey FM, et al. fMRI study of neural sensitization to hedonic stimuli in long-term, daily cannabis users. <i>Hum Brain Mapp</i> 2016;37(10):3431-3443                                                                   | 306 | 11  |
| 41              | Jiang H, et al. Brain activity and functional connectivity associated with hypnosis. <i>Cereb Cortex</i> 2017;27(8):4083-4093                                                                                             | 295 | 9   |
| 42 <sup>a</sup> | Acevedo BP, et al. The highly sensitive brain: an fMRI study of sensory processing sensitivity and response to others' emotions. <i>Brain Behav</i> 2014;4(4):580-594                                                     | 292 | 29  |
| 42 <sup>a</sup> | Carhart-Harris RL, et al. The entropic brain: a theory of conscious states informed by neuroimaging research with psychedelic drugs. <i>Front Hum Neurosci</i> 2014;8:20                                                  | 292 | 100 |

|    |                                                                                                                                                                                                                                                                                     |     |     |
|----|-------------------------------------------------------------------------------------------------------------------------------------------------------------------------------------------------------------------------------------------------------------------------------------|-----|-----|
| 44 | Gordon EM, et al. Precision functional mapping of individual human brains. <i>Neuron</i> 2017;95(4):791-807.e7                                                                                                                                                                      | 289 | 19  |
| 45 | Song H, et al. Love-related changes in the brain: a resting-state functional magnetic resonance imaging study. <i>Front Hum Neurosci</i> 2015;9:71                                                                                                                                  | 274 | 13  |
| 46 | Boecker H, et al. The runner's high: opioidergic mechanisms in the human brain. <i>Cereb Cortex</i> 2008;18(11):2523-2531                                                                                                                                                           | 268 | 165 |
| 47 | El Marroun H, et al. Prenatal cannabis and tobacco exposure in relation to brain morphology: a prospective neuroimaging study in young children. <i>Biol Psychiatry</i> 2016;79(12):971-979                                                                                         | 260 | 8   |
| 48 | Masterson TD, et al. Neural reactivity to visual food stimuli is reduced in some areas of the brain during evening hours compared to morning hours: an fMRI study in women. <i>Brain Imaging Behav</i> 2016;10(1):68-78                                                             | 255 | 5   |
| 49 | Szaflarski JP, et al. Practice guideline summary: use of fMRI in the presurgical evaluation of patients with epilepsy report of the guideline development, dissemination, and implementation subcommittee of the American academy of neurology. <i>Neurology</i> 2017;88(4):395-402 | 253 | 19  |
| 50 | Curtis BJ, et al. Sleep duration and resting fMRI functional connectivity: examination of short sleepers with and without perceived daytime dysfunction. <i>Brain Behav</i> 2016;6(12):e00576                                                                                       | 252 | 3   |
| 51 | Chirles TJ, et al. Exercise training and functional connectivity changes in mild cognitive impairment and healthy elders. <i>J Alzheimers Dis</i> 2017;57(3):845-856                                                                                                                | 249 | 6   |
| 52 | Schöll M, et al. PET imaging of tau deposition in the aging human brain. <i>Neuron</i> 2016;89(5):971-982                                                                                                                                                                           | 247 | 150 |
| 53 | Poldrack RA, et al. Scanning the horizon: towards transparent and reproducible neuroimaging research. <i>Nat Rev Neurosci</i> 2017;18(2):115-126                                                                                                                                    | 243 | 76  |
| 54 | Krause AJ, et al. The sleep-deprived human brain. <i>Nat Rev Neurosci</i> 2017;18(7):404-418.                                                                                                                                                                                       | 239 | 12  |
| 55 | Keynan JN, et al. Limbic activity modulation guided by fMRI-inspired EEG improves implicit                                                                                                                                                                                          | 232 | 12  |

|    |                                                                                                                                                                                                                |     |     |
|----|----------------------------------------------------------------------------------------------------------------------------------------------------------------------------------------------------------------|-----|-----|
|    | emotion regulation. <i>Biol Psychiatry</i> 2016;80(6):490-496                                                                                                                                                  |     |     |
| 56 | Soon CS, et al. Unconscious determinants of free decisions in the human brain. <i>Nat Neurosci</i> 2008;11(5):543-545                                                                                          | 223 | 1   |
| 57 | Moore E, et al. Diffusion tensor MRI tractography reveals increased fractional anisotropy (FA) in arcuate fasciculus following music-cued motor training. <i>Brain Cogn</i> 2017;116:40-46                     | 218 | 1   |
| 58 | Carhart-Harris RL, et al. The effect of acutely administered MDMA on subjective and BOLD-fMRI responses to favourite and worst autobiographical memories. <i>Int J Neuropsychopharmacol</i> 2014;17(4):527-540 | 216 | 21  |
| 59 | Schoenmakers S, et al. Linear reconstruction of perceived images from human brain activity. <i>Neuroimage</i> 2013;83:951-961                                                                                  | 208 | 24  |
| 60 | Lindbergh CA, et al. Relationship of lutein and zeaxanthin levels to neurocognitive functioning: an fMRI Study of older adults. <i>J Int Neuropsychol Soc</i> 2017;23(1):11-22                                 | 206 | 9   |
| 61 | Miyawaki Y, et al. Visual image reconstruction from human brain activity using a combination of multiscale local image decoders. <i>Neuron</i> 2008;60(5):915-929                                              | 205 | 199 |
| 62 | Felger JC, et al. Inflammation is associated with decreased functional connectivity within corticostriatal reward circuitry in depression. <i>Mol Psychiatry</i> 2016;21(10):1358-1365                         | 200 | 34  |
| 63 | Lim S, et al. Preferential detachment during human brain development: age- and sex-specific structural connectivity in diffusion tensor imaging (DTI) data. <i>Cereb Cortex</i> 2015;25(6):1477-1489           | 192 | 26  |
| 64 | Silveri MM, et al. Citicoline enhances frontal lobe bioenergetics as measured by phosphorus magnetic resonance spectroscopy. <i>NMR Biomed</i> 2008;21(10):1066-1075                                           | 191 | 27  |
| 65 | Manning KY, et al. Multiparametric MRI changes persist beyond recovery in concussed adolescent hockey players. <i>Neurology</i> 2017;89(21):2157-2166                                                          | 188 | 3   |
| 66 | Tsvetanov KA, et al. The effect of ageing on fMRI: correction for the confounding effects of vascular reactivity evaluated by joint fMRI and MEG in 335 adults. <i>Hum Brain</i>                               | 187 | 38  |

|                 |                                                                                                                                                                                                                        |     |     |
|-----------------|------------------------------------------------------------------------------------------------------------------------------------------------------------------------------------------------------------------------|-----|-----|
|                 | <i>Mapp</i> 2015;36(6):2248-2269                                                                                                                                                                                       |     |     |
| 67 <sup>a</sup> | Sasaki T, et al. Hockey concussion education project, part 3. White matter microstructure in ice hockey players with a history of concussion: a diffusion tensor imaging study. <i>J Neurosurg</i> 2014;120(4):882-890 | 184 | 0   |
| 67 <sup>a</sup> | Rippon G, et al. Recommendations for sex/gender neuroimaging research: key principles and implications for research design, analysis, and interpretation. <i>Front Hum Neurosci</i> 2014;8:650                         | 184 | 30  |
| 69 <sup>a</sup> | Spalek K, et al. Sex-dependent dissociation between emotional appraisal and memory: a large-scale behavioral and fMRI Study. <i>J Neurosci</i> 2015;35(3):920-935                                                      | 182 | 12  |
| 69 <sup>a</sup> | Dubois J, et al. Building a science of individual differences from fMRI. <i>Trends Cogn Sci</i> 2016;20(6):425-443                                                                                                     | 182 | 60  |
| 71 <sup>a</sup> | Rosenberg J, et al. Early to bed, early to rise? Diffusion tensor imaging identifies chronotype-specificity. <i>Neuroimage</i> 2014;84:428-434                                                                         | 178 | 21  |
| 71 <sup>a</sup> | Wenger E, et al. Expansion and renormalization of human brain structure during skill acquisition. <i>Trends Cogn Sci</i> 2017;21(12):930-939                                                                           | 178 | 2   |
| 73 <sup>a</sup> | Ware JB, et al. Combat-related mild traumatic brain injury: association between baseline diffusion-tensor imaging findings and long-term outcomes. <i>Radiology</i> 2016;280(1):212-219                                | 176 | 7   |
| 73 <sup>a</sup> | Haas BW, et al. The tendency to trust is reflected in human brain structure. <i>Neuroimage</i> 2015;107:175-181                                                                                                        | 176 | 10  |
| 75 <sup>a</sup> | Hyde DC, et al. Functional organization of the temporal-parietal junction for theory of mind in preverbal infants: a near-infrared spectroscopy study. <i>J Neurosci</i> 2018;38(18):4264-4274                         | 173 | 0   |
| 75 <sup>a</sup> | Bowman GL, et al. Nutrient biomarker patterns, cognitive function, and MRI measures of brain aging. <i>Neurology</i> 2012;78(4):241-249                                                                                | 173 | 76  |
| 77              | Fox KC, et al. Is meditation associated with altered brain structure? A systematic review and meta-analysis of morphometric neuroimaging in meditation practitioners. <i>Neurosci Biobehav</i>                         | 171 | 118 |

|                 |                                                                                                                                                                                           |     |     |
|-----------------|-------------------------------------------------------------------------------------------------------------------------------------------------------------------------------------------|-----|-----|
|                 | Rev 2014;43:48-73                                                                                                                                                                         |     |     |
| 78              | Cogoni C, et al. Reduced empathic responses for sexually objectified women: an fMRI investigation. <i>Cortex</i> 2018;99:258-272                                                          | 169 | 1   |
| 79 <sup>a</sup> | Molenberghs P, et al. The neural correlates of justified and unjustified killing: an fMRI study. <i>Soc Cogn Affect Neurosci</i> 2015;10(10):1397-1404                                    | 166 | 7   |
| 79 <sup>a</sup> | Huth AG, et al. A continuous semantic space describes the representation of thousands of object and action categories across the human brain. <i>Neuron</i> 2012;76(6):1210-1224          | 166 | 220 |
| 81 <sup>a</sup> | Decety J, et al. An fMRI study of affective perspective taking in individuals with psychopathy: imagining another in pain does not evoke empathy. <i>Front Hum Neurosci</i> 2013;7:489    | 164 | 97  |
| 81 <sup>a</sup> | Jenkins LM, et al. Shared white matter alterations across emotional disorders: a voxel-based meta-analysis of fractional anisotropy. <i>Neuroimage Clin</i> 2016;12:1022-1034             | 164 | 4   |
| 83              | Hibar DP, et al. Cortical abnormalities in bipolar disorder: an MRI analysis of 6503 individuals from the ENIGMA bipolar disorder working group. <i>Mol Psychiatry</i> 2018;23(4):932-942 | 162 | 2   |
| 84 <sup>a</sup> | Jack AI, et al. fMRI reveals reciprocal inhibition between social and physical cognitive domains. <i>Neuroimage</i> 2013;66:385-401                                                       | 159 | 49  |
| 84 <sup>a</sup> | Koike T, et al. Neural substrates of shared attention as social memory: a hyperscanning functional magnetic resonance imaging study. <i>Neuroimage</i> 2016;125:401-412                   | 159 | 10  |
| 86 <sup>a</sup> | Rosenberg MD, et al. A neuromarker of sustained attention from whole-brain functional connectivity. <i>Nat Neurosci</i> 2016;19(1):165-171                                                | 157 | 91  |
| 86 <sup>a</sup> | Paech D, et al. T1p-weighted dynamic glucose-enhanced MR Imaging in the human brain. <i>Radiology</i> 2017;285(3):914-922                                                                 | 157 | 0   |
| 88 <sup>a</sup> | Karns CM, et al. The cultivation of pure altruism via gratitude: a functional MRI study of change with gratitude practice. <i>Front Hum Neurosci</i> 2017;11:599                          | 156 | 2   |
| 88 <sup>a</sup> | Jaillard A, et al. Pain, heat, and emotion with functional MRI. <i>N Engl J Med</i> 2013; 368(15):1447-                                                                                   | 156 | 3   |



|                 |                                                                                                                                                                                                                                |     |    |
|-----------------|--------------------------------------------------------------------------------------------------------------------------------------------------------------------------------------------------------------------------------|-----|----|
|                 | 1449                                                                                                                                                                                                                           |     |    |
| 90 <sup>a</sup> | Schnyer DM, et al. Evaluating the diagnostic utility of applying a machine learning algorithm to diffusion tensor MRI measures in individuals with major depressive disorder. <i>Psychiatry Res Neuroimaging</i> 2017;264:1-9  | 153 | 2  |
| 90 <sup>a</sup> | Schweizer TA, et al. Brain activity during driving with distraction: an immersive fMRI study. <i>Front Hum Neurosci</i> 2013;7:53                                                                                              | 153 | 30 |
| 92 <sup>a</sup> | Pasternak O, et al. Hockey concussion education project, part 2. Microstructural white matter alterations in acutely concussed ice hockey players: a longitudinal free-water MRI study. <i>J Neurosurg</i> 2014;120(4):873-881 | 152 | 0  |
| 92 <sup>a</sup> | Tiwari P, et al. Computer-extracted texture features to distinguish cerebral radionecrosis from recurrent brain tumors on multiparametric MRI: a feasibility study. <i>AJNR Am J Neuroradiol</i> 2016;37(12):2231-2236         | 152 | 8  |
| 92 <sup>a</sup> | Shan ZY, et al. Brain function characteristics of chronic fatigue syndrome: a task fMRI study. <i>Neuroimage Clin</i> 2018;19:279-286                                                                                          | 152 | 0  |
| 92 <sup>a</sup> | Chamberlain R, et al. Drawing on the right side of the brain: a voxel-based morphometry analysis of observational drawing. <i>Neuroimage</i> 2014;96:167-173                                                                   | 152 | 10 |
| 96              | Grotheer M, et al. Neuroimaging evidence of a bilateral representation for visually presented numbers. <i>J Neurosci</i> 2016;36(1):88-97                                                                                      | 151 | 18 |
| 97              | Bakker A, et al. Response of the medial temporal lobe network in amnesic mild cognitive impairment to therapeutic intervention assessed by fMRI and memory task performance. <i>Neuroimage Clin</i> 2015;7:688-698             | 150 | 43 |
| 98              | Dresler M, et al. Neural correlates of dream lucidity obtained from contrasting lucid versus non-lucid REM sleep: a combined EEG/fMRI case study. <i>Sleep</i> 2012;35(7):1017-1020                                            | 147 | 61 |
| 99              | Roxana G, et al. Functional MRI of disease progression in Parkinson disease and atypical parkinsonian syndromes. <i>Neurology</i> 2016;87(7):709–717                                                                           | 146 | 15 |

|     |                                                                                                                                                              |     |    |
|-----|--------------------------------------------------------------------------------------------------------------------------------------------------------------|-----|----|
| 100 | Staubo SC, et al. Mediterranean diet, micronutrients and macronutrients, and MRI measures of cortical thickness. <i>Alzheimers Dement</i> 2017;13(2):168-177 | 145 | 11 |
|-----|--------------------------------------------------------------------------------------------------------------------------------------------------------------|-----|----|

<sup>a</sup>Articles have the same rank because they have an equal number of Altmetric Attention Score
